# Supplementary material for: A Potential Role of Cyclic Dependent Kinase 1 (CDK1) in Late Stage of Retinal Degeneration
Source: MDPI journal article supplement (doi:10.3390/cells11142143), 2022-07-07
Supplement: s1 [file s1]

## Supplementary Materials

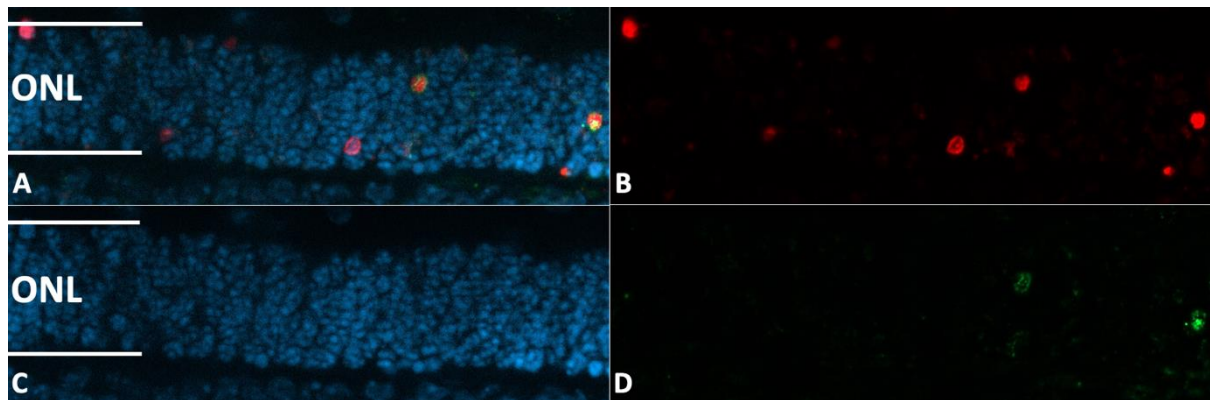

**Figure S1.** Co-staining for CDK1 and TUNEL in a rd1 retinal explant at a timepoint equivalent to P11. CDK1 was stained in green and TUNEL was stained in red, while DAPI (blue) was used as a nuclear counterstain. A: Immunostaining with multiple channels (red, green and blue). B: Single channel to represent TUNEL-positive cells. C: Single channel to represent DAPI. D: Single channel to represent CDK1-positive cells.

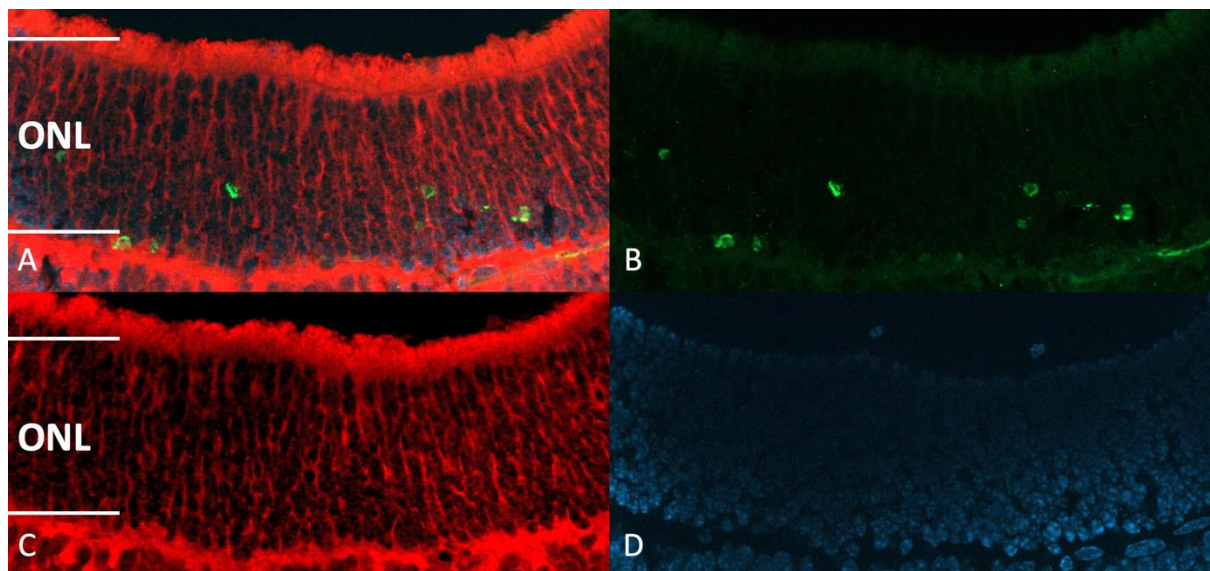

**Figure S2.** Co-staining for CDK1 and arrestin within ONL from rd1 model. CDK1 was stained in green and arrestin was stained in red, while DAPI (blue) was used as a nuclear counterstain. A: Immunostaining with multiple channels (red, green and blue). B: Single channel to represent CDK1-positive cells. C: Single channel to represent arrestin-positive cells. D: Single channel to represent DAPI.

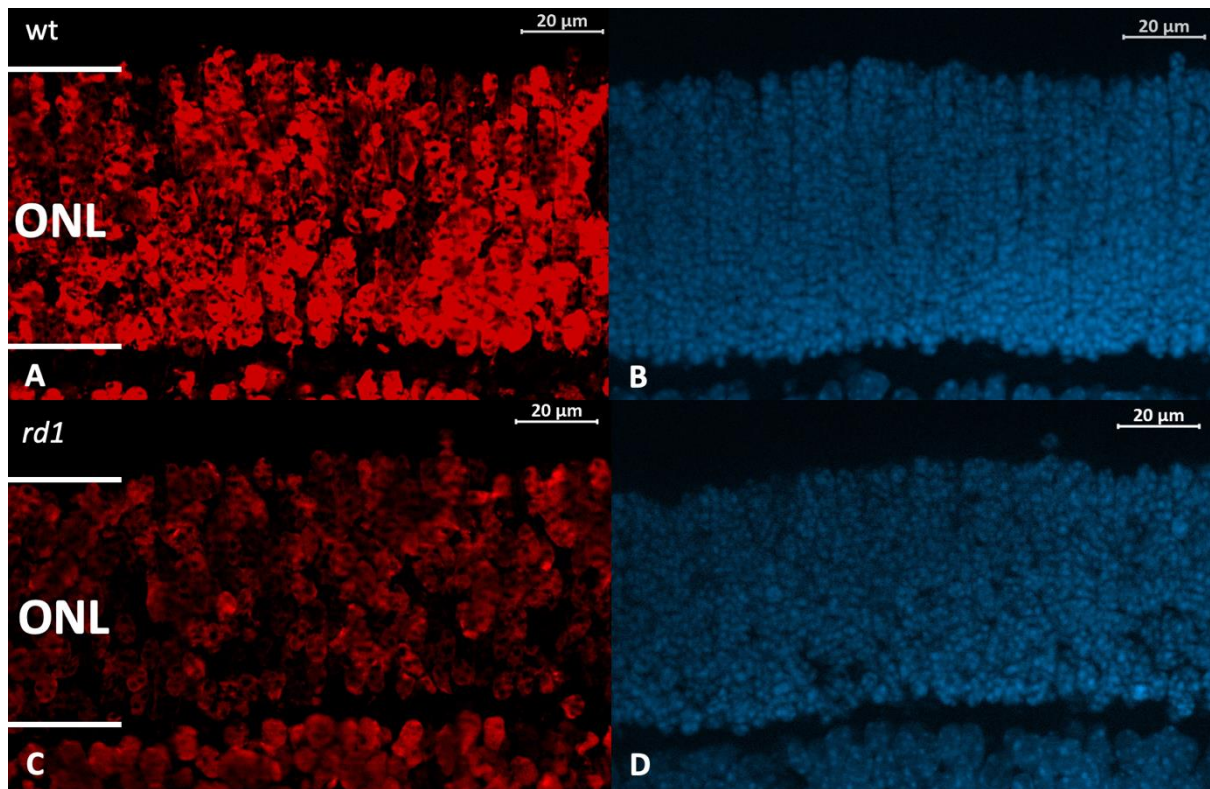

**Figure S3.** Evaluation of acetylated lysine (AC, red) expression within ONL from wt and its *rd1* counterpart at P11, and DAPI (blue) was used as a nuclear counterstain. A: Immunostaining with multiple channels (red and blue). A, B: Single channel to represent AC-positive cells and DAPI, respectively in ONL from in a wt retina. C, D: Single channel to represent AC-positive cells and DAPI, respectively in ONL in an *rd1* retina.

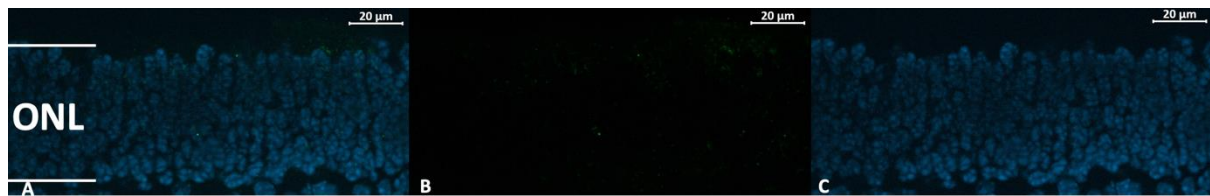

**Figure S4.** Immunostaining of CDK1 expression (green) within ONL of a P11 retinal explant from the wt strain (as a control to its *rd1* counterpart), and DAPI (blue) was used as a nuclear counterstain. A: Immunostaining with multiple channels (green and blue). B: Single channel to represent CDK1-positive cells. C: Single channel to represent DAPI. Note the absence of green CDK1 signal.
